# Supplementary material for: Characterization of Polysulfides, Polysulfanes, and Other Unique Species in the Reaction between GSNO and H2S
Source: PubMed Central journal article supplement (PMC6749520; doi:10.3390/molecules24173090), 2019-08-26
Supplement: molecules-24-03090-s001.pdf [file molecules-24-03090-s001.pdf]

# Characterization of polysulfides, polysulfanes and other unique species in the reaction between GSNO and H<sub>2</sub>S

*Murugaeson R Kumar and Patrick J Farmer\**

Department of Chemistry and Biochemistry, Baylor University, Waco, TX 76798

- S1.** LCMS of oxidized polysulfides in MeOH with 1% formic acid mobile phase
- S2.** LC-MS/MS of GSS<sub>n</sub>G products
- S3.** Reaction of GSNO with H<sub>2</sub>S in carbonate buffer at pH 10
- S4.** Reaction of GSNO with H<sub>2</sub>S at different temperatures
- S5.** Reaction of GSNO with H<sub>2</sub>S gas
- S6.** Reactions of GSSG and GSH w/wo elemental Sulfur
- S7.** Comparison of reaction of GSNO and H<sub>2</sub>S w/wo elemental Sulfur
- S8.** Reaction of GSH with sodium thiosulfate, Na<sub>2</sub>S<sub>2</sub>O<sub>3</sub>.
- S9.** Reaction of GSNO with H<sub>2</sub>S with and without Na<sub>2</sub>S<sub>2</sub>O<sub>3</sub>
- S10.** Mass spectra of reduced GSS<sub>n</sub>H identified in the reaction of GSNO with H<sub>2</sub>S.
- S11.** LC-MS/MS of GSS<sub>n</sub>H products
- S12.** LC-MS/MS of GSS<sub>n</sub>SO<sub>3</sub>H products
- S13.** MS comparison of GSSH and GSO<sub>2</sub>H in aerobic reactions
- S14.** LC-MS/MS of GSS<sub>n</sub>SO<sub>2</sub>H products
- S15.** LC-MS/MS of GSS<sub>n</sub>NH<sub>2</sub> products
- S16.** LC-MS/MS of GSNS<sub>n</sub>A<sub>2</sub> products

S1. LCMS of oxidized polysulfides in MeOH with 1 % formic acid mobile phase

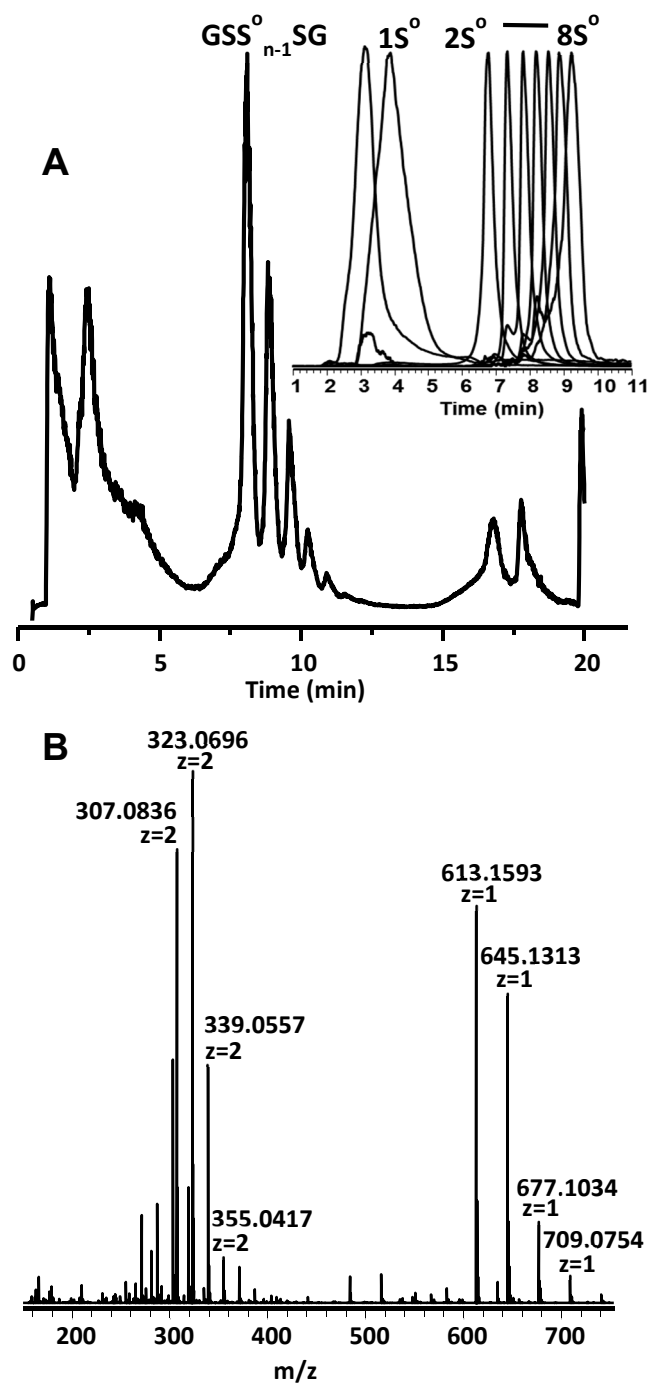

**Figure S1.** LC-HRMS analysis of oxidized glutathione polysulfane species formed in a 1:5 reaction of GSNO with Na<sub>2</sub>S at pH 7, with 0.1% formic acid-methanol as carrier stream. A) The total ion LC spectra. (inset) Normalized selective ion chromatograms (SICs) showing a series of GSS<sub>n</sub>SG polysulfanes, n = 0-8, and the separation times of each within the overall LC spectra. (B) Region of the total ion mass spectra showing peaks assigned as shown, to dications.

S2. LC-MS/MS of GSS<sub>n</sub>G products.

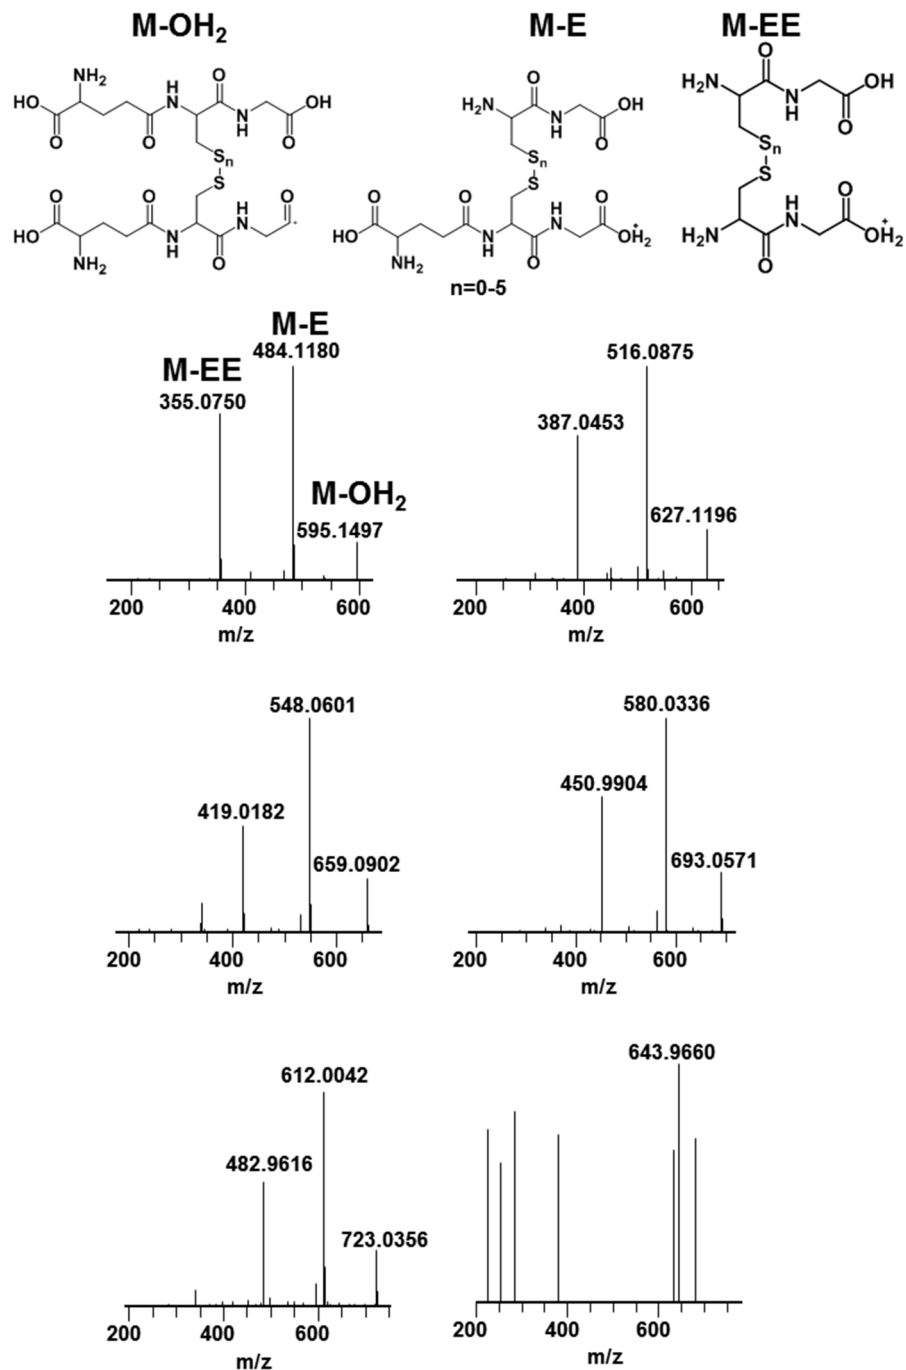

**Figure S2.** LCMS MS/MS study of glutathione polysulfides (oxidized) formed in the reaction of GSNO 1 mM) with Na<sub>2</sub>S (5 mM) in iP buffer at pH 7.

### S3. Reaction of GSNO with H<sub>2</sub>S in carbonate buffer at pH 10.

**High pH reactions of GSNO with H<sub>2</sub>S.** The reaction solutions were allowed to stand for an hour before LC/MS analysis. For temperature dependent studies the reaction solutions were incubated at 37 °C in Excella E24 incubator.

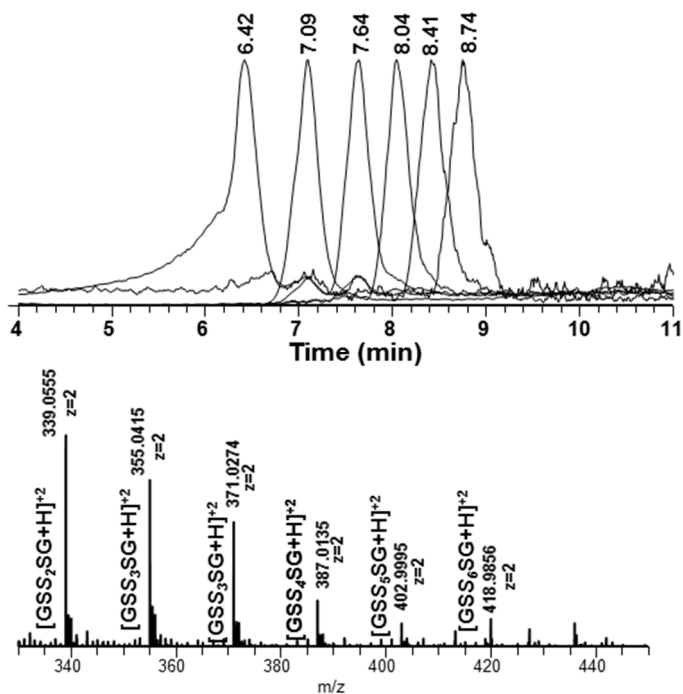

**Figure S3. Reactions at high pH.** Orbitrap LCMS study of reaction of GSNO (1 mM) with Na<sub>2</sub>S (5 mM) in carbonate buffer at pH 10. (Top) SIC of glutathione polysulfides (oxidized) species and (Bottom) their corresponding mass spectra.

#### S4. Reaction of GSNO with H<sub>2</sub>S at different temperatures

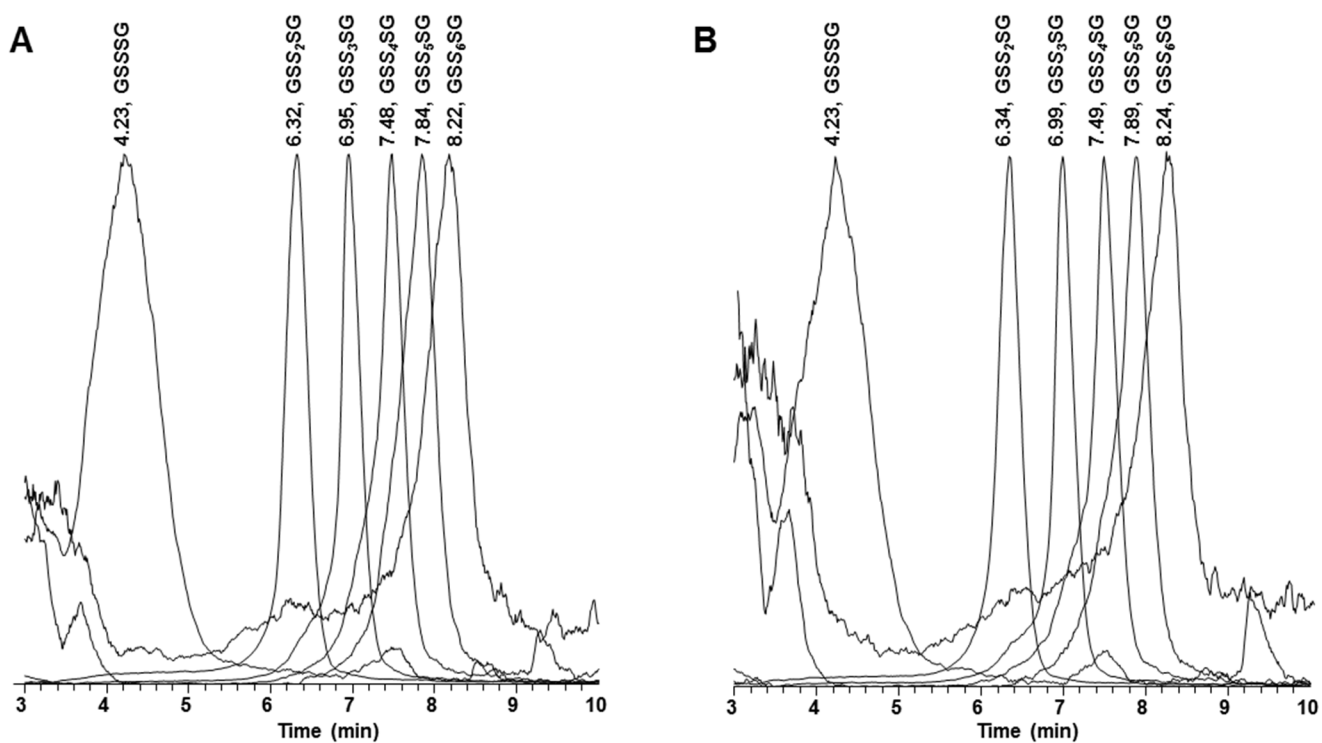

**Figure S4.** SIC of glutathione polysulfides obtained from the analysis of LCMS of reaction of GSNO (1 mM) with Na<sub>2</sub>S (5 mM) in iP buffer at pH 7. (A) 25 °C and (B) 35 °C.

## S5. Reaction of GSNO with H<sub>2</sub>S gas

**Reaction of GSNO or GSSG with H<sub>2</sub>S(g).** As a control reaction, gaseous H<sub>2</sub>S was generated by addition of concentrated HCl to Na<sub>2</sub>S under inert N<sub>2</sub> purge which was bubbled directly through an aqueous solution of GSNO or GSSG in iP buffer pH 7. The reaction solutions were allowed to stand for an hour before LC/MS analysis.

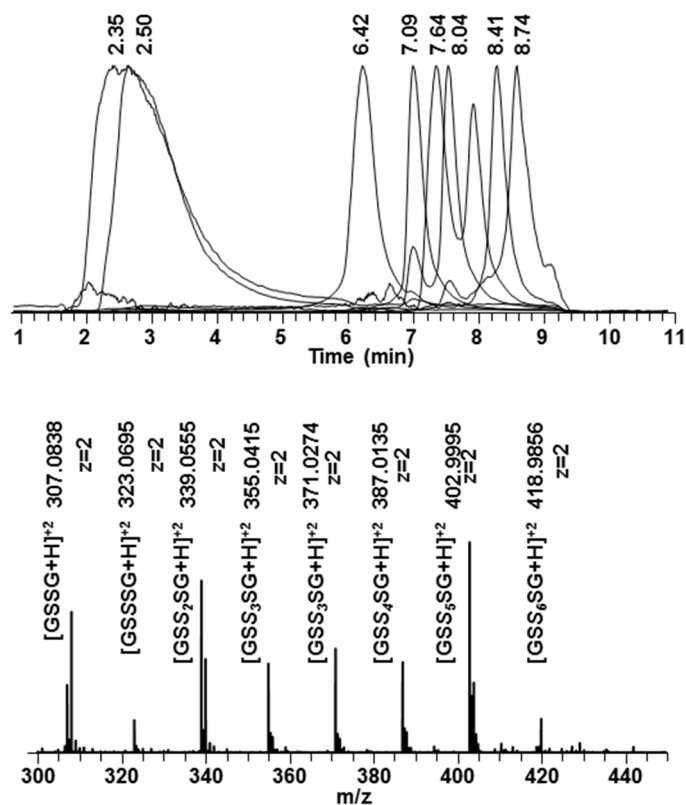

**Figure S5.** Orbitrap LCMS study of reaction of GSNO (1mM) with H<sub>2</sub>S (gas) generated from Na<sub>2</sub>S-HCl mixture in iP buffer at pH 7. (Top) SIC of glutathione polysulfides (oxidized) species and (Bottom) their corresponding mass spectra.

## S6. Reactions of GSSG and GSH with elemental Sulfur.

**Reactions with elemental Sulfur(s).** To reaction solutions of GSH (1 mM) or GSSG (1 mM) were added elemental sulfur (solid) in iP buffer, pH 7 and allowed to stand for 24 h.

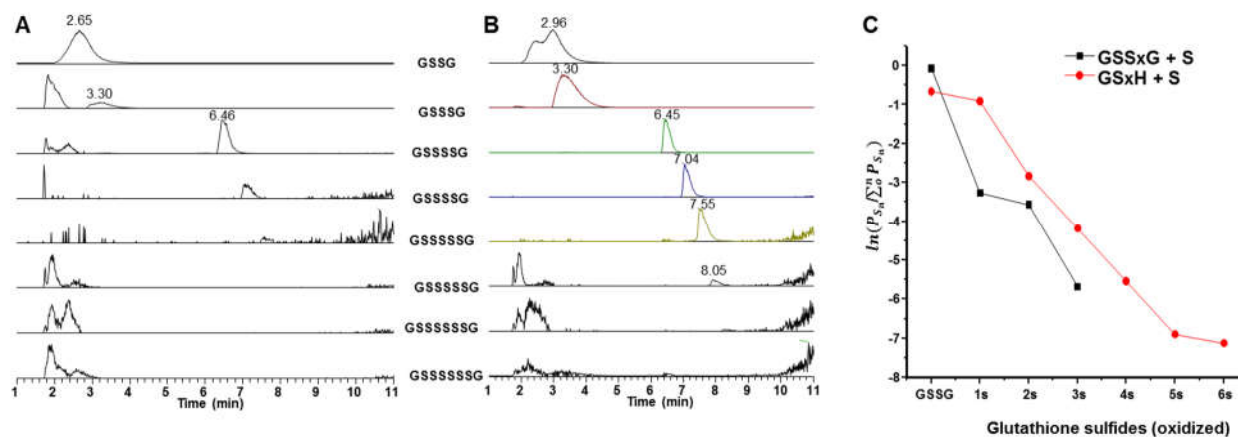

**Figure 6.** SICs of oxidized glutathione polysulfides ( $GSS_xSG$ ) from the Orbitrap LCMS analysis of reaction of (A) 1 mM of GSSG, (B) 1 mM of GSH with excess S in iP buffer at pH 7 and (C) relative distribution of the glutathione polysulfide species.

S7. Comparison of reaction of GSNO with H<sub>2</sub>S with and without the presence of elemental Sulfur.

**Reactions of GSNO/H<sub>2</sub>S in presence and absence of S(s).** To the reaction solutions of GSNO (1 mM) and Na<sub>2</sub>S (5 mM), were added elemental sulfur (solid) in iP buffer, pH 7 and allowed to stand for 24 h.

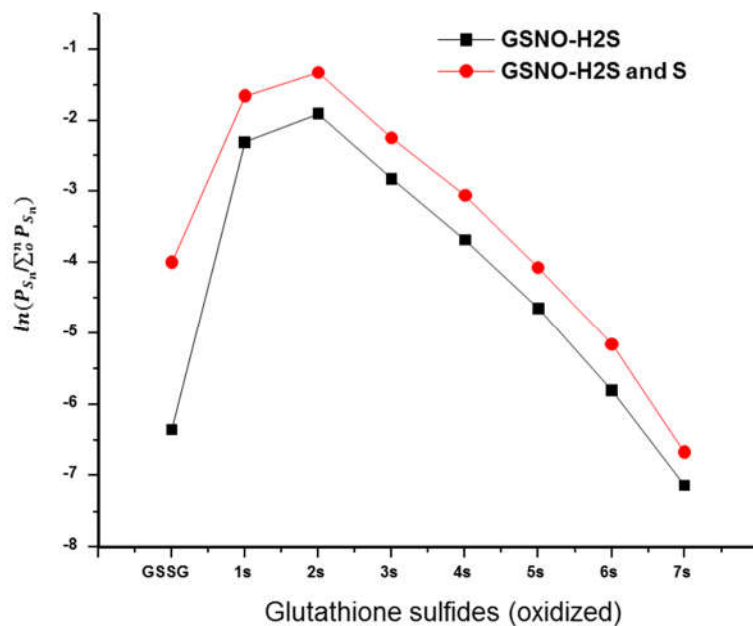

**Figure S7.** Relative distribution of the glutathione polysulfide species calculated in the presence (red) and absence (black) of S with GSNO (1 mM) and Na<sub>2</sub>S (5 mM) in iP buffer at pH 7.



## S8. Reaction of GSH with sodium thiosulfate, $\text{Na}_2\text{S}_2\text{O}_3$ .

**Reactions of sulfite and thiosulfate with GSH.** 5 mM of GSH was mixed either with 10-fold excess  $\text{Na}_2\text{SO}_3$  or  $\text{Na}_2\text{S}_2\text{O}_3$  in iP buffer pH 7. The reaction solutions were allowed to stand overnight before LC/MS analysis.

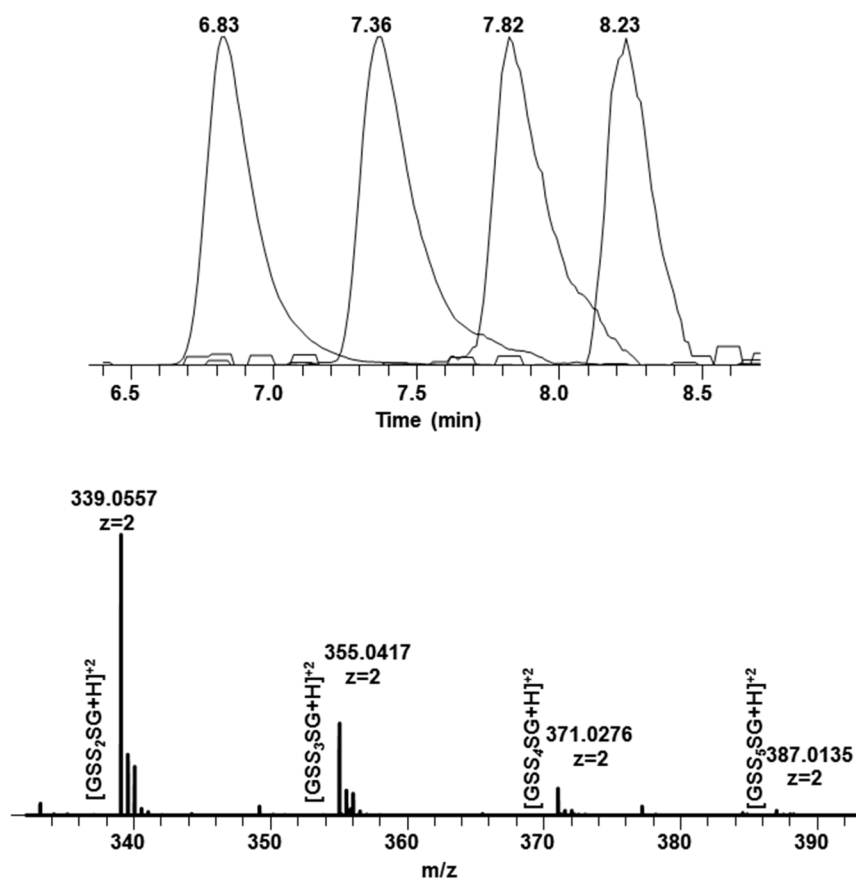

**Figure S8.** Orbitrap LCMS study of reaction of GSH (1 mM) with  $\text{Na}_2\text{S}_2\text{O}_3$  (5 mM) in iP buffer at pH 7. Top: SIC of glutathione polysulfides (oxidized) species. Bottom: their corresponding mass spectra.

S9. Reaction of GSNO with H<sub>2</sub>S with and without Na<sub>2</sub>S<sub>2</sub>O<sub>3</sub>.

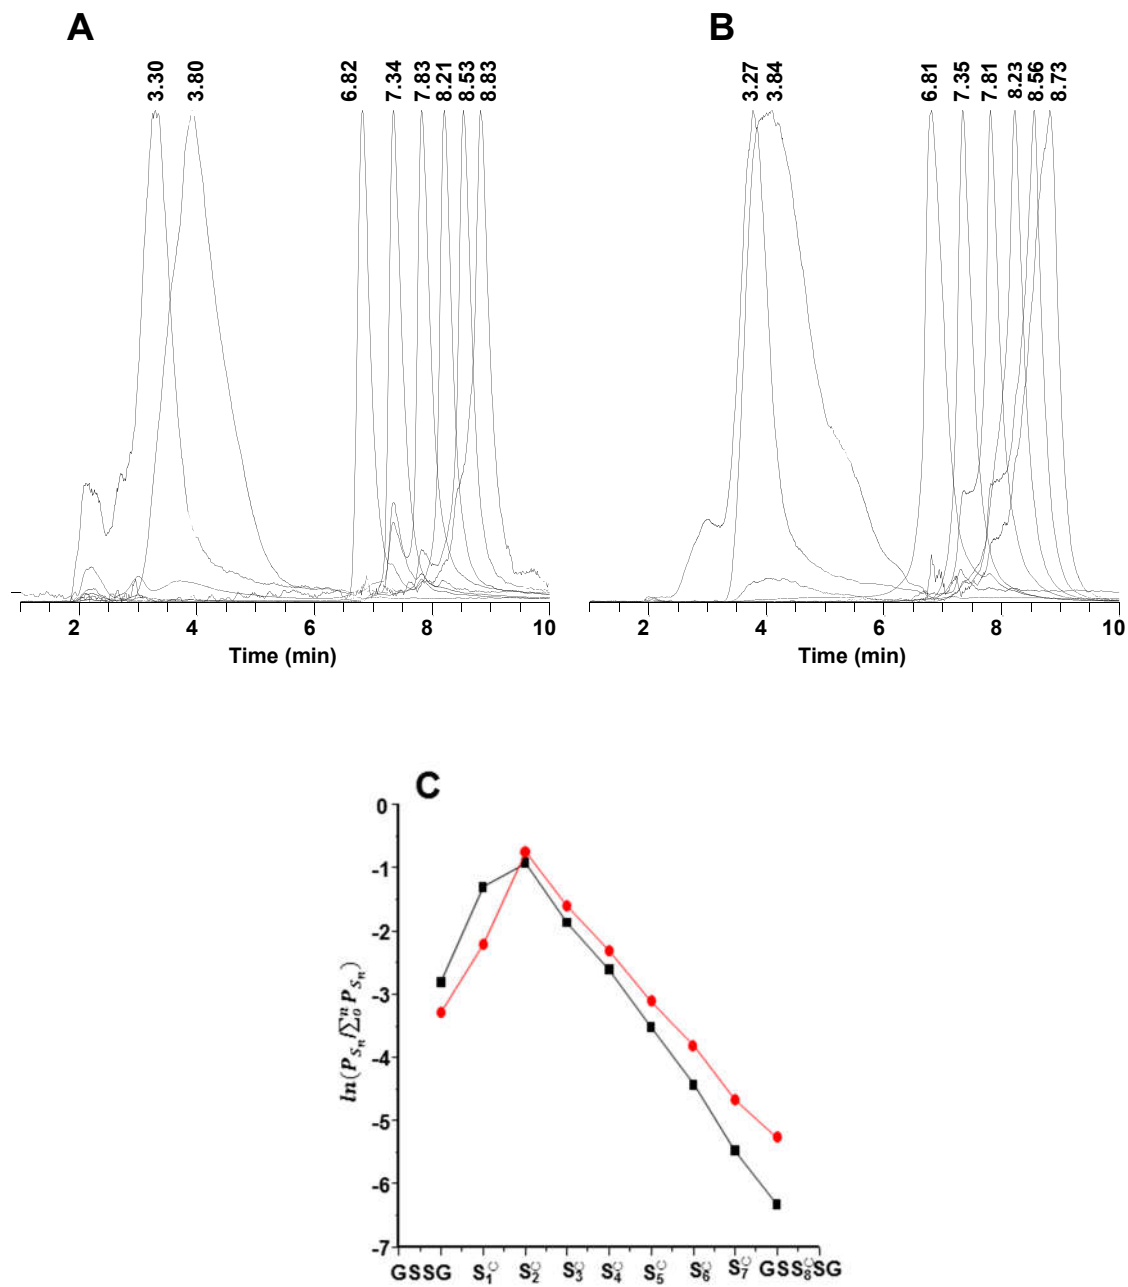

**Figure S9.** Orbitrap LCMS study of reaction of GSNO (1 mM) with Na<sub>2</sub>S (5 mM) in iP buffer at pH 7, in the (A) absence, (B) presence of Na<sub>2</sub>S<sub>2</sub>O<sub>3</sub> (5 mM) and their relative distributions of GSS<sub>n</sub>SG products (C); Na<sub>2</sub>S<sub>2</sub>O<sub>3</sub> absence (squares) and Na<sub>2</sub>S<sub>2</sub>O<sub>3</sub> presence (circles).

S10. Mass spectra of reduced GSS<sub>n</sub>H identified in the reaction of GSNO with H<sub>2</sub>S.

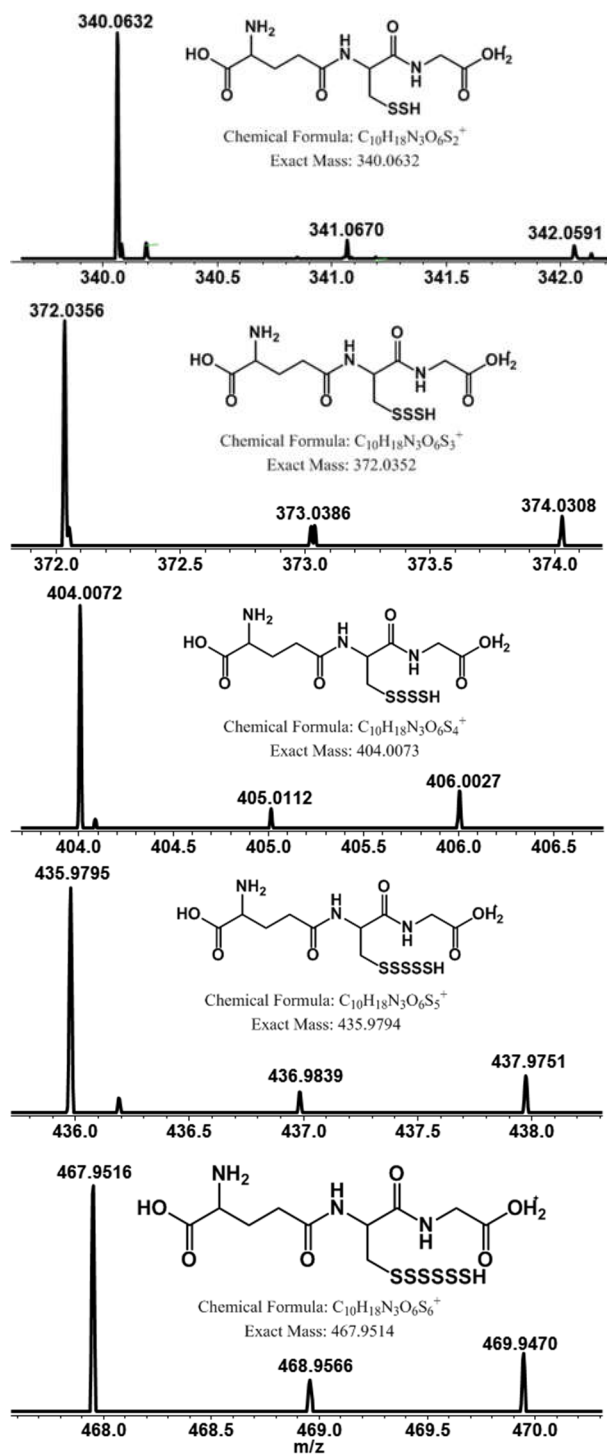

**Figure S10.** Orbitrap MS glutathione polysulfides (reduced) formed in the reaction of GSNO (1 mM) with Na<sub>2</sub>S (5 mM) in iP buffer at pH 7.

### S11. LC-MS/MS of GSS<sub>n</sub>H products

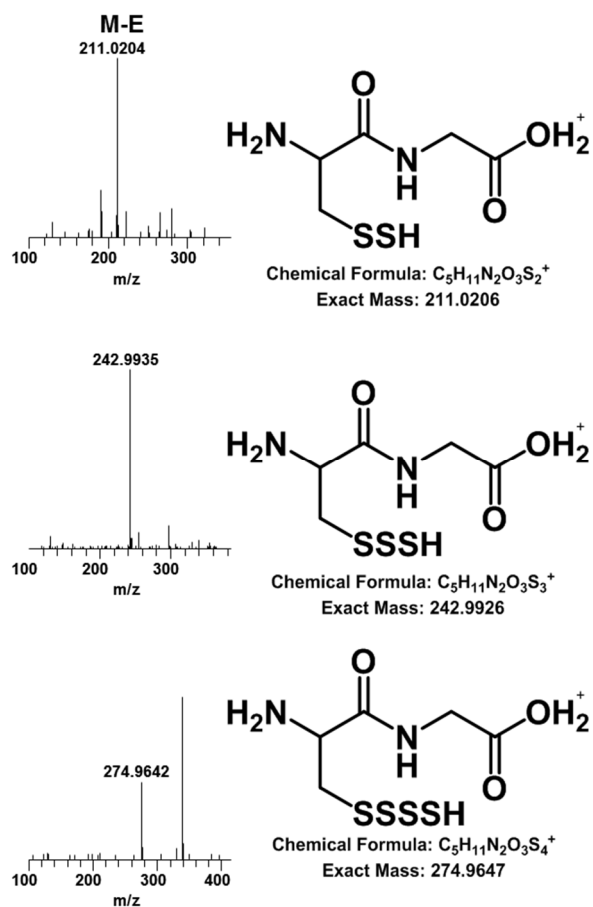

**Figure S11.** Orbitrap LCMS MS/MS study of glutathione polysulfides (reduced) formed in the reaction of GSNO (1 mM) with Na<sub>2</sub>S (5 mM) in iP buffer at pH 7.

S12. LC-MS/MS of GSS<sub>n</sub>SO<sub>3</sub>H product

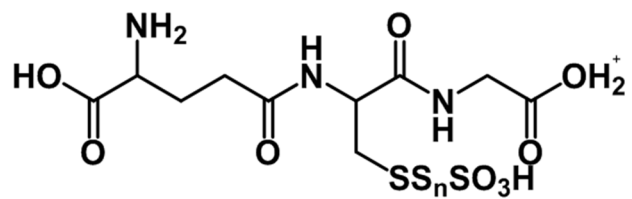

n = 2-4

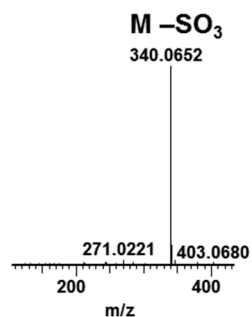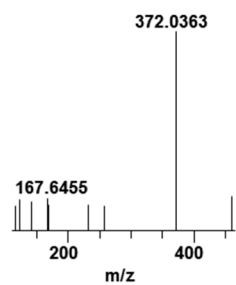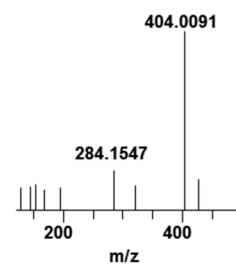

**Figure S12.** Orbitrap LCMS MS/MS study of glutathione polythiosulfonates formed in the reaction of GSNO (1 mM) with Na<sub>2</sub>S (5 mM) in iP buffer at pH 7.

### S13. MS comparison of GSSH and GSO<sub>2</sub>H in aerobic reactions

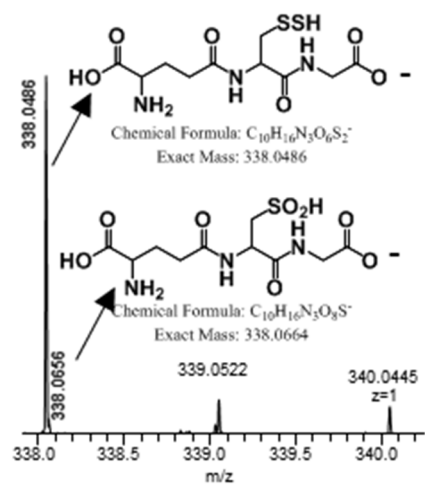

**Figure S13.** LCMS study in the negative ion mode of GSSH and GSO<sub>2</sub>H and glutathione sulfinic acid formed in the reaction of GSNO (1 mM) with Na<sub>2</sub>S (5 mM) in iP buffer at pH 7.

S14. LC-MS/MS of GSS<sub>n</sub>SO<sub>2</sub>H product

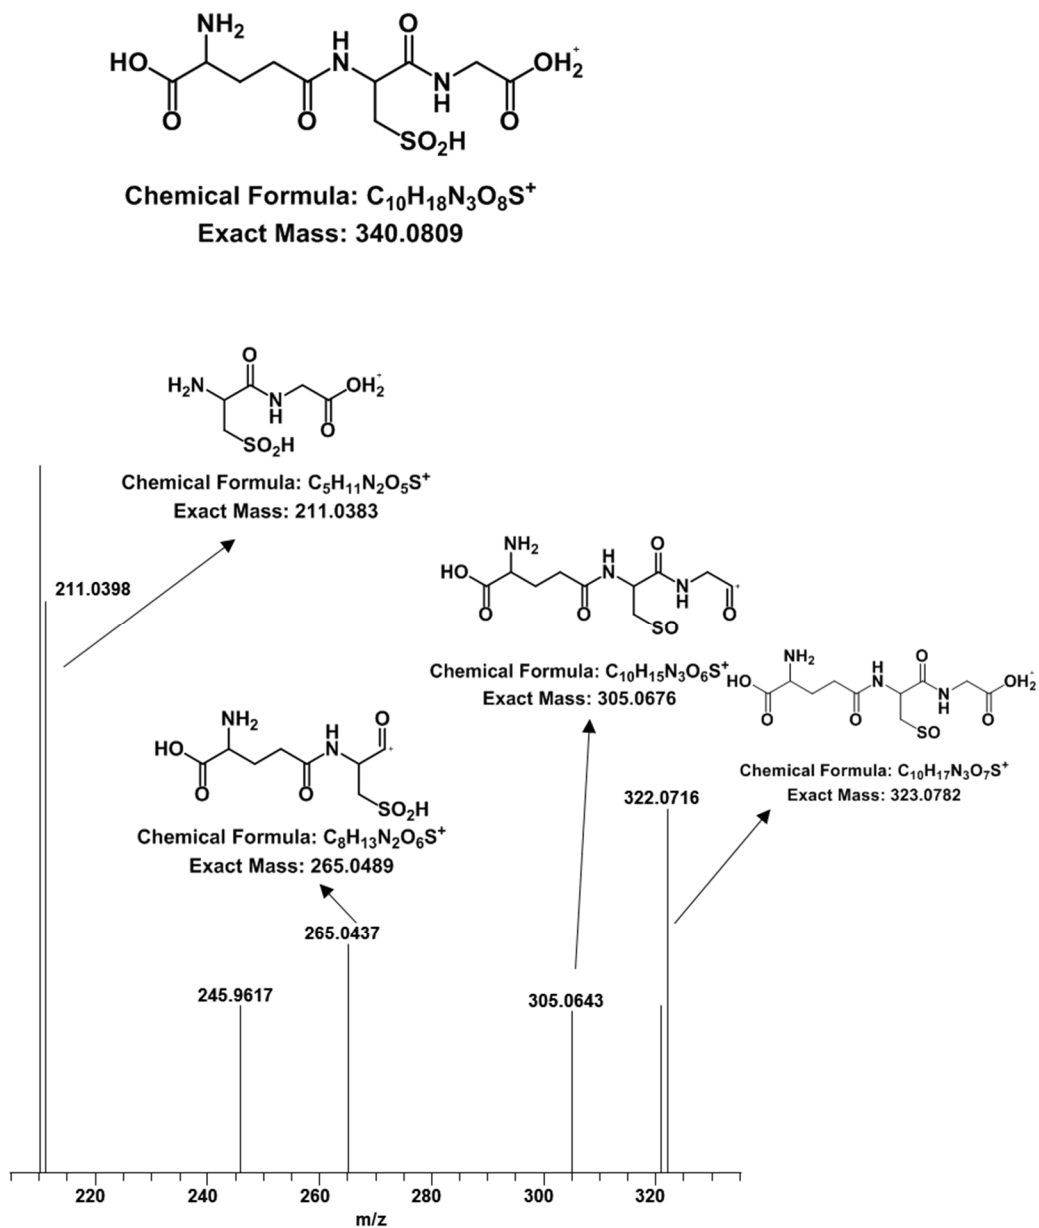

**Figure S14.** Orbitrap LCMS MS/MS study of glutathione sulfinic acid formed in the reaction of GSNO (1 mM) with Na<sub>2</sub>S (5 mM) in iP buffer at pH 7.

S15. LC-MS/MS of GSS<sub>n</sub>NH<sub>2</sub> product

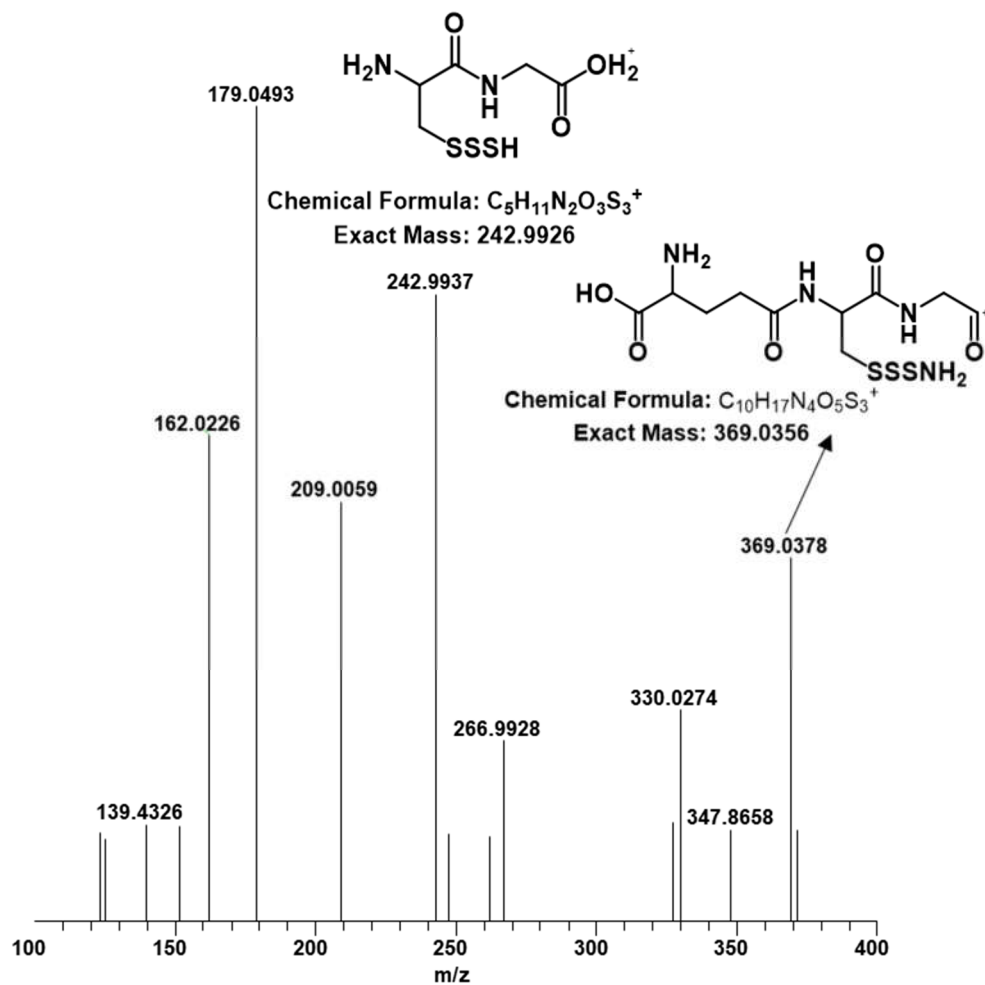

**Figure S15.** Orbitrap LCMS MS/MS study of GSS<sub>n</sub>NH<sub>2</sub> products formed in the reaction of GSNO (1 mM) with Na<sub>2</sub>S (5 mM) in iP buffer at pH 7.



S16. LC-MS/MS of GSS<sub>n</sub>NA<sub>2</sub> product

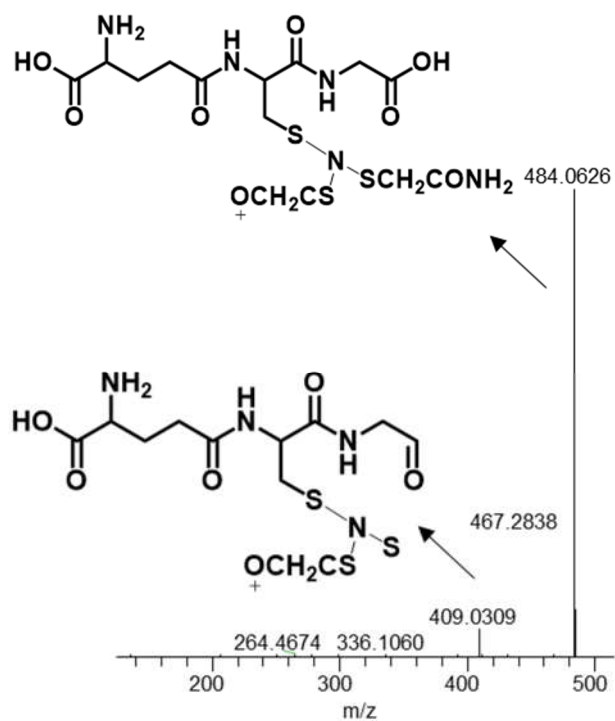

**Figure S16.** Orbitrap LCMS MS/MS study of GSS<sub>n</sub>A<sub>2</sub> products formed in the reaction of GSNO (1 mM) with Na<sub>2</sub>S (5 mM) and IA (5 mM) in iP buffer at pH 7.
